# Supplementary material for: Addressing voltage hysteresis in Li-rich cathode materials via gas–solid interface modification
Source: Royal Society of Chemistry journal article supplement (doi:10.1039/d2nr05936c), 2023-01-01
Supplement: d2nr05936c1.pdf [file d2nr05936c1.pdf]

## Supporting Information

### **Addressing voltage hysteresis in Li-rich cathode materials via gas-solid interface modification**

Qing Zhao,<sup>a</sup> Mengke Zhang,<sup>a</sup> Zhengcheng Ye,<sup>a</sup> Yao Li,<sup>a</sup> Lang Qiu,<sup>a</sup> Zhuo Zheng,<sup>b</sup> Yang Liu,<sup>c</sup> Benhe Zhong,<sup>a</sup> Yang Song,<sup>a,\*</sup> Xiaodong Guo<sup>a</sup>

*a College of Chemical Engineering, Sichuan University, Chengdu 610065, Sichuan, China.*

*b The State Key Laboratory of Polymer Materials Engineering, Polymer Research Institute of Sichuan University, Chengdu 610065, Sichuan, China.*

*c School of Materials Science and Engineering, Henan Normal University, Xinxiang 453007, Henan, China.*

\* Corresponding authors. E-mail addresses: [songyang@scu.edu.cn](mailto:songyang@scu.edu.cn) (Yang Song).

### Supplementary Note 1

The Calculation Method of Diffusion Coefficient:  $\text{Li}^+$  diffusion coefficient ( $D_{\text{Li}^+}$ ) is calculated by the following equation:

$$D_{\text{Li}^+} = \frac{4}{\pi\tau} \left( \frac{m_B V_m}{M_B S} \right)^2 \left( \frac{\Delta E_S}{\Delta E_\tau} \right)^2$$

In this formula,  $\tau$ ,  $m_B$ ,  $M_B$ , and  $V_m$  respectively stand for the time duration during the current pulse, active material mass on the electrode, molecular weight, and molar volume of active material.  $S$  means the contact area between the electrolyte and the electrode.  $\Delta E_s$  is the steady-state voltage change, and  $\Delta E_\tau$  is the potential change during charging or discharging at the time of current of flux after subtracting the IR drop.<sup>1</sup>

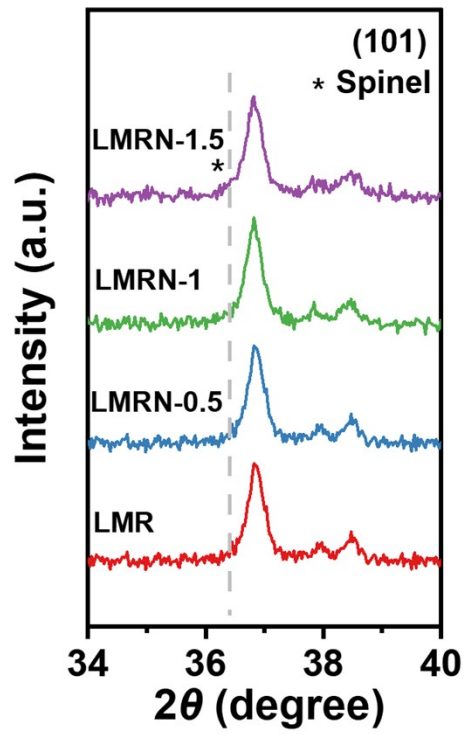

**Fig. S1** The enlargement views of the diffraction peaks of (101).

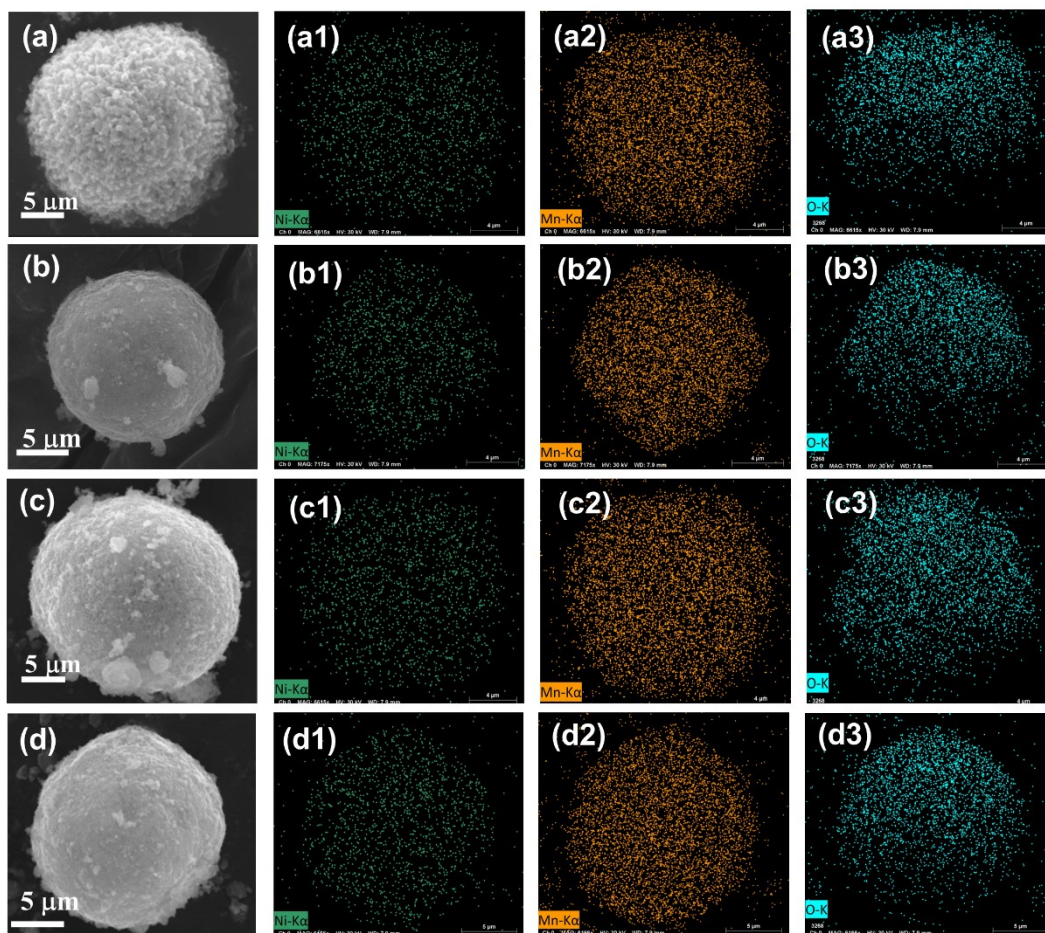

**Fig. S2** The SEM and EDS-mapping images of pristine and modified samples: (a) LMR, (b) LMRN-0.5, (c) LMRN-1 and (d) LMRN-1.5; the EDS-mapping images of (a1-a3) LMR, (b1-b3) LMRN-0.5, (c1-c3) LMRN-1 and (d1-d3) LMRN-1.5.

EDS mapping is carried out to reveal the elemental dispersion of selected areas, where elemental Mn (yellow), Ni (green), and O (blue) of the target materials are uniformly distributed, suggesting the oxygen vacancy uniform generated does not affect the distribution of the elements.

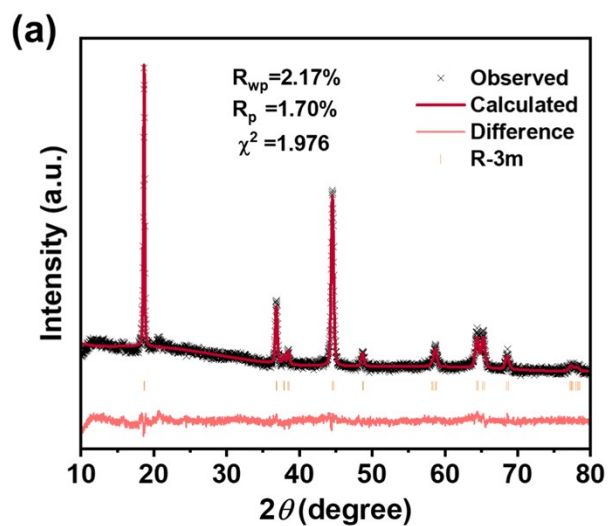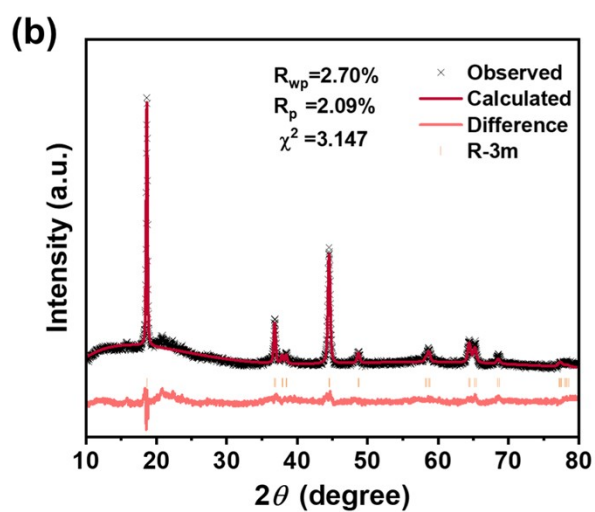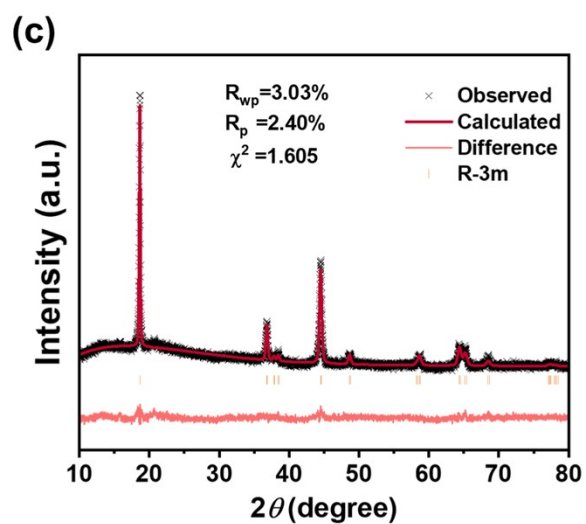

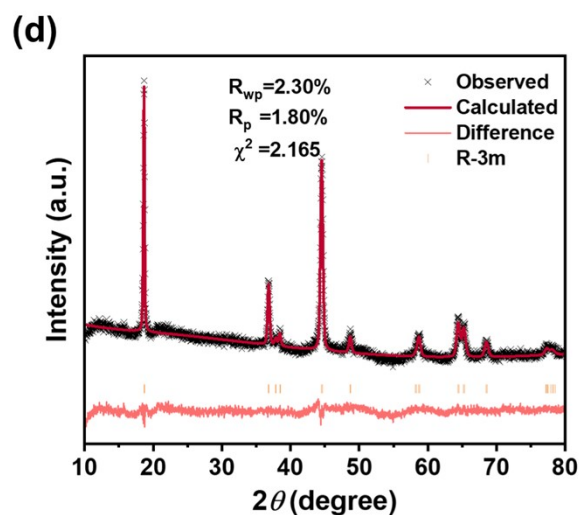

**Fig. S3** XRD Rietveld refinements of (a) LMR, (b) LMRN-0.5, (c) LMRN-1, (d) and LMRN-1.5.

Fig. S3 shows the Rietveld refinements of all materials respectively. It can be seen that  $R_{wp}$  and  $R_p$  in all the Rietveld refinements data are less than 10%, indicating that the results are more accurate.

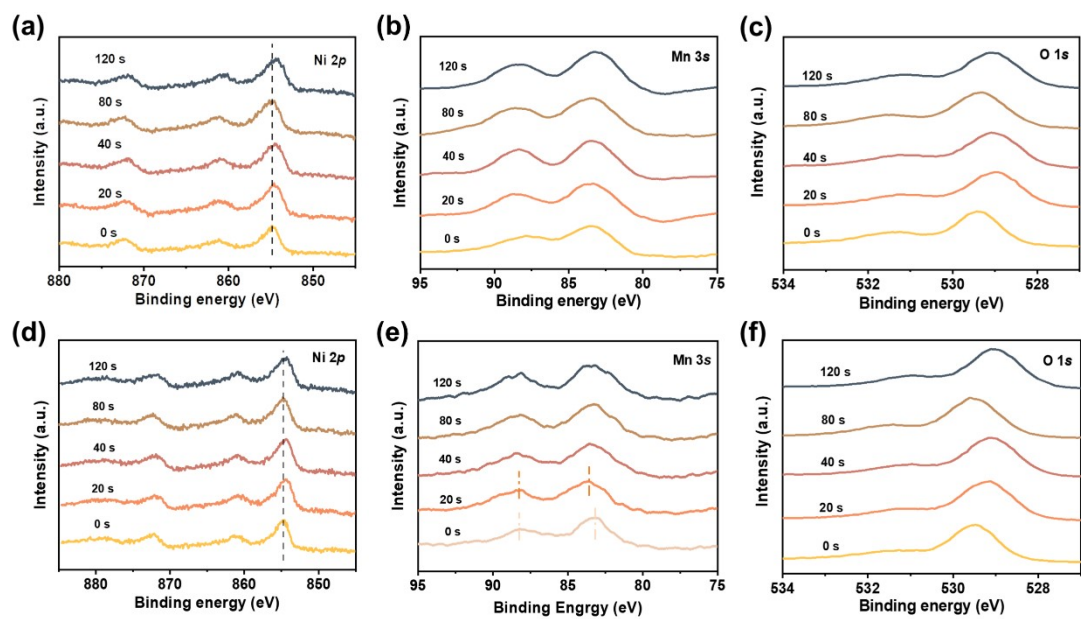

**Fig. S4** XPS profiles of (a) Ni 2*p*, (b) Mn 3*s*, and (c) O 1*s* of LMR and (d) Ni 2*p*, (e) Mn 3*s*, and (f) O 1*s* of LMRN-1 at various depths.

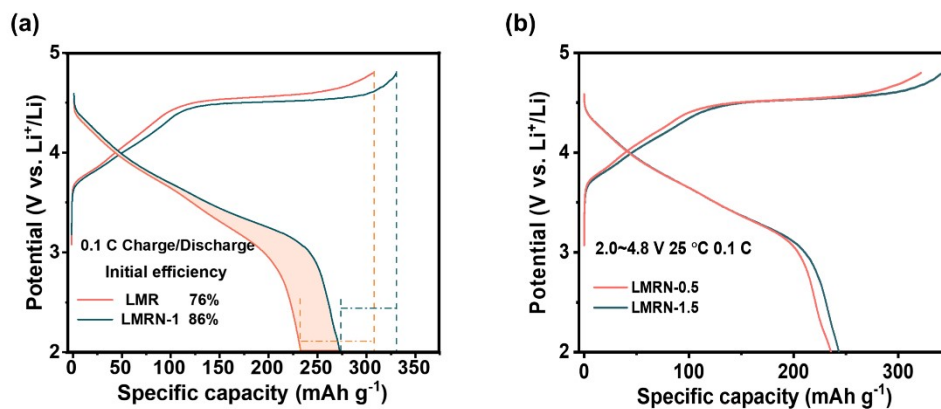

**Fig. S5** (a) Initial charge/discharge curves of LMR and LMRN-1 sample and (b) The initial charge and discharge curves of other samples at 0.1 C, 25 °C, and 2.0-4.8 V.



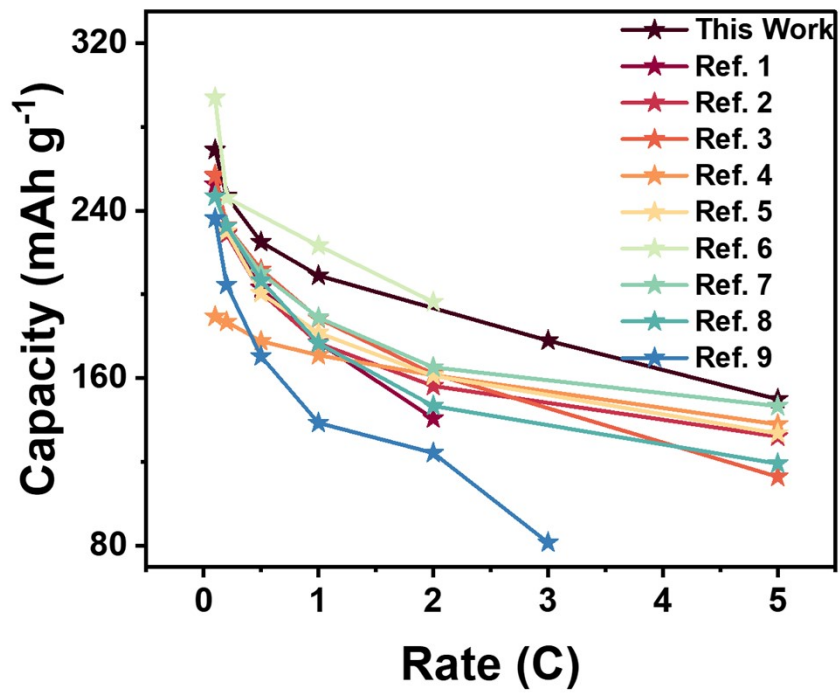

**Fig. S6** Comparison of discharge capacity at different current densities between this work and previous reports.<sup>3-11</sup>

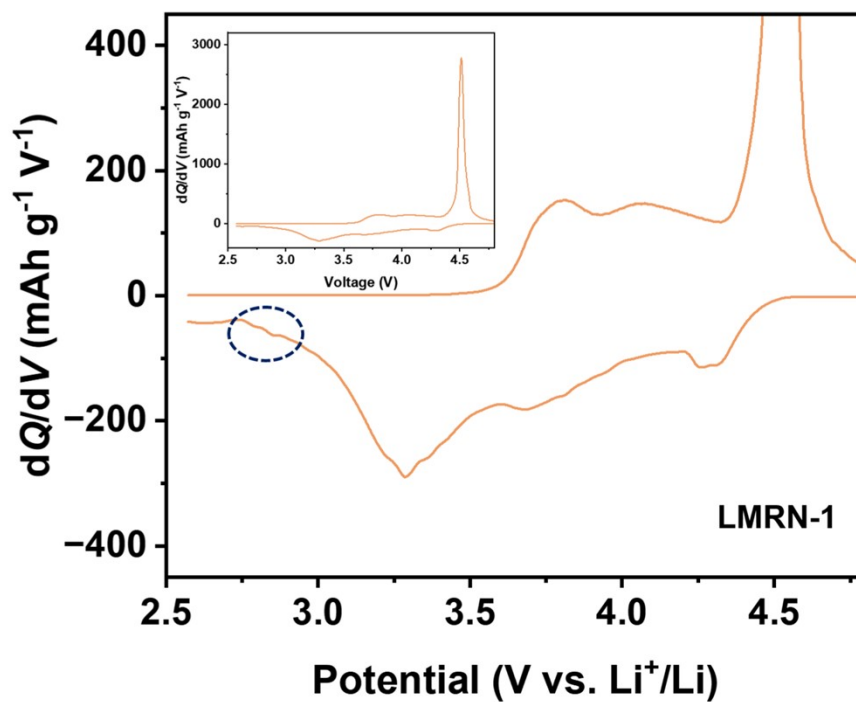

**Fig. S7** Differential capacity ( $dQ/dV$ ) plots versus voltage of first cycle of electrodes prepared from LMRN-1 at 0.1 C.

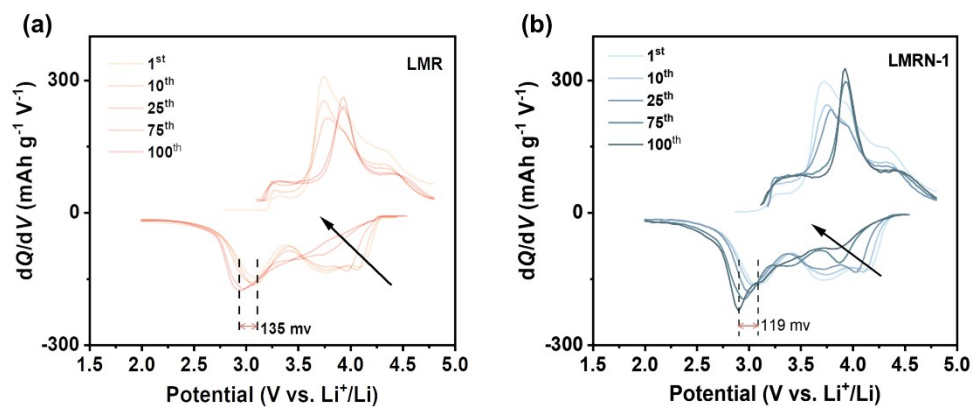

**Fig. S8** Differential charge capacity curves of (a) LMR and (b) LMRN-1 in 100 cycles between 2.0 and 4.8 V.

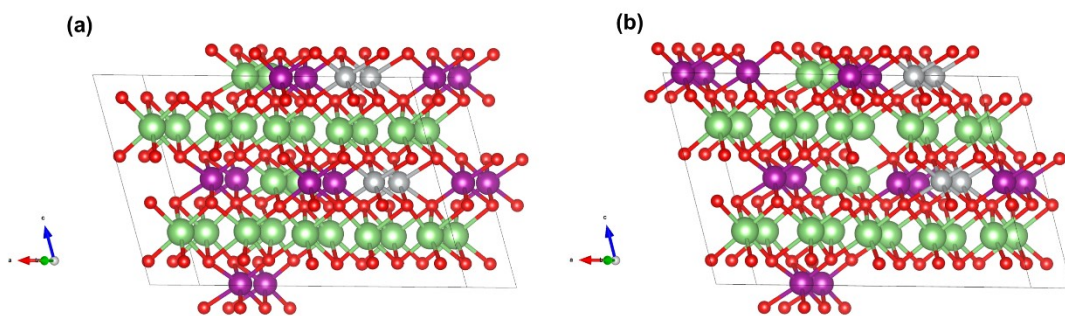

**Fig. S9** The crystal structure model of (a) pristine and (b) LMRN-1 sample for DFT calculation.

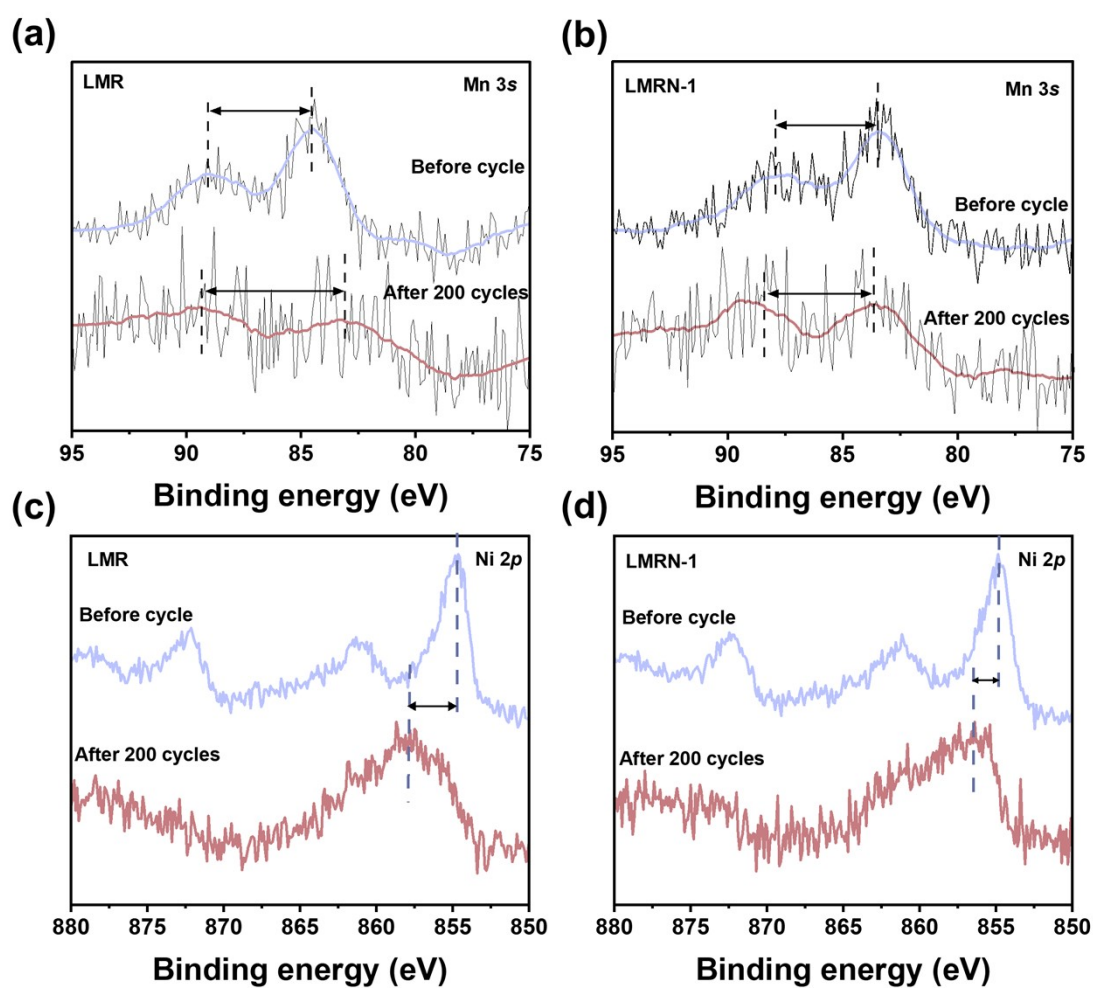

**Fig. S10** The XPS spectra of Mn 3s and Ni 2p for LMR (a and c), LMRN-1 (b and d) before cycle and after 200 cycles.

**Table S1.** The Rietveld refinement for LMR, LMRN-0.5, LMRN-1.0 and LMRN-1.5.

| Material | $a$ (Å) | $c$ (Å) | $c/a$  |
|----------|---------|---------|--------|
| LMR      | 2.8586  | 14.2525 | 4.9858 |
| LMRN-0.5 | 2.8598  | 14.2527 | 4.9838 |
| LMRN-1.0 | 2.8666  | 14.2782 | 4.9810 |
| LMRN-1.5 | 2.8610  | 14.2534 | 4.9819 |

**Table S2.** Comparison of discharge capacity at different current densities between this work and previous reports.

| Cathode                                                                      | 0.1C  | 0.2C  | 0.5C  | 1C    | 2C    | 3C    | 5 C   | Cycle performance    | Ref.      |
|------------------------------------------------------------------------------|-------|-------|-------|-------|-------|-------|-------|----------------------|-----------|
| $\text{Li}_{1.2}\text{Ni}_{0.2}\text{Mn}_{0.6}\text{O}_2$                    | 269.0 | 247.0 | 225.0 | 209.0 |       | 178.0 | 150.0 | 1 C-200 cycles-90%   | This work |
| $\text{Li}_{1.2}\text{Ni}_{0.2}\text{Mn}_{0.6}\text{O}_2$                    | 252.4 | 229.5 | 203.0 | 177.1 | 140.8 |       |       | 0.5 C-300 cycles-80% | 3         |
| $\text{Li}_{1.2}\text{Ni}_{0.2}\text{Mn}_{0.6}\text{O}_2$                    | 256.6 | 228.7 | 200.8 | 176.7 | 156.3 |       | 132.1 | 0.1 C-100 cycles-93% | 4         |
| $\text{Li}_{1.2}\text{Mn}_{0.54}\text{Ni}_{0.13}\text{Co}_{0.13}\text{O}_2$  | 257.0 | 232.8 | 211.9 | 188.5 | 162.0 |       | 112.9 | 2 C-700 cycles-81%   | 5         |
| $\text{LiNi}_{0.6}\text{Mn}_{0.2}\text{Co}_{0.2}\text{O}_2$                  | 189.4 | 186.9 | 177.7 | 170.9 | 161.4 |       | 137.9 | 1 C-150 cycles-98%   | 6         |
| $\text{Li}_{1.2}\text{Ni}_{0.2}\text{Mn}_{0.6}\text{O}_2$                    |       | 230.1 | 200.6 | 181.7 | 161.2 |       | 133.7 | 1 C-100 cycles-80%   | 7         |
| $\text{Li}_{1.2}\text{Mn}_{0.54}\text{Ni}_{0.13}\text{Co}_{0.13}\text{O}_2$  | 293.9 |       | 246.2 | 223.2 | 196.4 |       |       | 0.1 C-100 cycles-95% | 8         |
| $\text{Li}_{1.2}\text{Ni}_{0.2}\text{Mn}_{0.6}\text{O}_2$                    |       | 223.5 | 210.1 | 188.9 | 165.2 |       | 146.7 | 1 C-500 cycles-86%   | 9         |
| $\text{Li}_{1.2}\text{Mn}_{0.56}\text{Ni}_{0.16}\text{Co}_{0.08}\text{O}_2$  | 246.8 | 232.6 | 206.7 | 176.7 | 146.7 |       | 119.3 | 1 C-500 cycles-87%   | 10        |
| $\text{Li}_{1.7}\text{Mn}_{0.8}\text{Co}_{0.1}\text{Ni}_{0.1}\text{O}_{2.7}$ | 236.2 | 204.6 | 170.4 | 138.6 | 124.3 | 81.5  |       | 0.2 C-500 cycles-76% | 11        |

**Table S3.** The EIS fitting results for the LMR, LMRN-0.5, LMRN-1.0 and LMRN-1.5 materials.

| Material | Before the cycle |                  | After 200 cycles |                  |
|----------|------------------|------------------|------------------|------------------|
|          | Re ( $\Omega$ )  | Rct ( $\Omega$ ) | Re ( $\Omega$ )  | Rct ( $\Omega$ ) |
| LMR      | 1.414            | 89.04            | 9.593            | 137.3            |
| LMRN-0.5 | 1.815            | 65.00            | 3.606            | 109.4            |
| LMRN-1.0 | 1.083            | 34.40            | 12.70            | 46.70            |
| LMRN-1.5 | 2.898            | 71.15            | 4.527            | 103.8            |

## References

- 1 B. Xiao, Y. Wang, S. Tan, M. Song, X. Li, Y. Zhang, F. Lin, K. S. Han, F. Omenya, K. Amine, X. Q. Yang, D. Reed, Y. Hu, G. L. Xu, E. Hu, X. Li and X. Li, *Angew. Chem. Int. Ed.*, 2021, **60**, 8258-8267.
- 2 S. Jeong, K. Choi, V. C. Ho, J. Cho, J. S. Bae, S. C. Nam, T. Yim and J. Mun, *Chem. Eng. J.*, 2022, **434**, 1314577.
- 3 W. Zhu, Z. G. Tai, C. Y. Shu, S. K. Chong, S. W. Guo, L. J. Ji, Y. Z. Chen and Y. N. Liu, *J. Mater. Chem. A*, 2020, **8**, 7991-8001.
- 4 S. Zhao, B. Sun, K. Yan, J. Zhang, C. Wang and G. Wang, *ACS Appl. Mater. Interfaces*, 2018, **10**, 33260-33268.
- 5 W. Zhang, Y. Sun, H. Deng, J. Ma, Y. Zeng, Z. Zhu, Z. Lv, H. Xia, X. Ge, S. Cao, Y. Xiao, S. Xi, Y. Du, A. Cao and X. Chen, *Adv. Mater.*, 2020, **32**, e2000496.
- 6 W. Bao, G. Qian, L. Zhao, Y. Yu, L. Su, X. Cai, H. Zhao, Y. Zuo, Y. Zhang, H. Li, Z. Peng, L. Li and J. Xie, *Nano Lett.*, 2020, **20**, 8832-8840.
- 7 S. Chen, Y. Zheng, Y. Lu, Y. Su, L. Bao, N. Li, Y. Li, J. Wang, R. Chen and F. Wu, *ACS Appl. Mater. Interfaces*, 2017, **9**, 8669-8678.
- 8 S. Liu, Z. P. Liu, X. Shen, W. H. Li, Y. R. Gao, M. N. Banis, M. S. Li, K. Chen, L. Zhu, R. C. Yu, Z. X. Wang, X. L. Sun, G. Lu, Q. Y. Kong, X. D. Bai and L. Q. Chen, *Adv. Energy Mater.*, 2018, **8**, 201802105.
- 9 L. Nie, Z. Wang, X. Zhao, S. Chen, Y. He, H. Zhao, T. Gao, Y. Zhang, L. Dong, F. Kim, Y. Yu and W. Liu, *Nano Lett.*, 2021, **21**, 8370-8377.
- 10 J. X. Meng, L. S. Xu, Q. X. Ma, M. Q. Yang, Y. Z. Fang, G. Y. Wan, R. H. Li, J. J. Yuan, X. K. Zhang, H. J. Yu, L. L. Liu and T. F. Liu, *Adv. Funct. Mater.*, 2022, **32**, 2113013.



- 11 C. Huang, Z. Q. Fang, Z. J. Wang, J. W. Zhao, S. X. Zhao and L. J. Ci, *Nanoscale*, 2021, **13**, 4921-4930.
